# Supplementary material
Source: PubMed Central journal article supplement (PMC7330827)
Supplement: jamasurg-155-752-s001.pdf [file jamasurg-155-752-s001.pdf]

## Supplementary Online Content

Le Blanc JM, Heller DR, Friedrich A, Lannin DR, Park TS. Association of Medicaid expansion under the Affordable Care Act with breast cancer stage at diagnosis. *JAMA Surg*. Published online July 1, 2020. doi:10.1001/jamasurg.2020.1495

**eTable 1.** Change in Stage of Breast Cancer by State and Insurance Type

**eTable 2.** Percent Uninsured and Percent Late Stage Among Breast Cancer Patients by State

**eTable 3.** Breast Cancer Stage at Diagnosis by Race, Age and State

**eTable 4.** 2016 State Demographic Information

This supplementary material has been provided by the authors to give readers additional information about their work.

**eTable 1. Change in Stage of Breast Cancer by State and Insurance Type**

|                                         |                   | 2012-2013     | 2015-2016     | P value   |
|-----------------------------------------|-------------------|---------------|---------------|-----------|
| <b>Non-Expansion states<sup>a</sup></b> |                   |               |               |           |
| Private/Medicare                        | Early stage (0-2) | 127,714 (89%) | 141,670 (86%) | < 0.00001 |
|                                         | Late stage (3,4)  | 15,860 (11%)  | 22,415 (14%)  |           |
|                                         | Total             | 143,574       | 164,085       |           |
| <b>Uninsured/Medicaid</b>               |                   |               |               |           |
| Uninsured/Medicaid                      | Early stage (0-2) | 11,266 (76%)  | 10,016 (77%)  | 0.135     |
|                                         | Late stage (3,4)  | 3,604 (24%)   | 3,072 (23%)   |           |
|                                         | Total             | 14,870        | 13,088        |           |
| <b>Expansion states<sup>b</sup></b>     |                   |               |               |           |
| Private/Medicare                        | Early stage (0-2) | 213,208 (89%) | 229,250 (89%) | < 0.00001 |
|                                         | Late stage (3,4)  | 26,614 (11%)  | 26,936 (11%)  |           |
|                                         | Total             | 239,822       | 256,186       |           |
| <b>Uninsured/Medicaid</b>               |                   |               |               |           |
| Uninsured/Medicaid                      | Early stage (0-2) | 16,524 (78%)  | 17,870 (81%)  | < 0.00001 |
|                                         | Late stage (3,4)  | 4,603 (22%)   | 4,280 (19%)   |           |
|                                         | Total             | 21,127        | 22,150        |           |

a) Alabama, Florida, Georgia, Kansas, Mississippi, Missouri, North Carolina, Oklahoma, South Carolina, Tennessee, Texas, Wisconsin, Wyoming, Idaho, Nebraska, Utah

b) Alaska, Arizona, Arkansas, California, Colorado, Connecticut, Hawaii, Illinois, Indiana, Iowa, Kentucky, Louisiana, Maine, Maryland, Michigan, Minnesota, Montana, Nevada, New Hampshire, New Jersey, New Mexico, North Dakota, Ohio, Oregon, Pennsylvania, Rhode Island, Virginia, Washington, West Virginia

**eTable 2. Percent Uninsured and Percent Late Stage Among Breast Cancer Patients by State**

|                                   | Percent uninsured        |                          | Percent late stage      |                         |
|-----------------------------------|--------------------------|--------------------------|-------------------------|-------------------------|
|                                   | 2012-2013                | 2015-2016                | 2012-2013               | 2015-2016               |
| <b>Non-expansion states</b>       |                          |                          |                         |                         |
| Alabama                           | 132/448 (29%)            | 114/453 (25%)            | 115/448 (26%)           | 98/453 (22%)            |
| Florida                           | 1194/2709 (44%)          | 764/1923 (40%)           | 653/2709 (24%)          | 413/1923 (21%)          |
| Georgia                           | 442/1980 (22%)           | 433/1787 (24%)           | 510/1980 (26%)          | 463/1787 (26%)          |
| Kansas                            | 56/175 (32%)             | 34/149 (23%)             | 41/175 (23%)            | 35/149 (23%)            |
| Mississippi                       | 137/325 (42%)            | 100/290 (34%)            | 90/325 (28%)            | 86/290 (30%)            |
| Missouri                          | 143/933 (15%)            | 110/734 (15%)            | 224/933 (24%)           | 171/734 (23%)           |
| North Carolina                    | 579/1562 (37%)           | 478/1473 (32%)           | 381/1562 (24%)          | 359/1473 (24%)          |
| Oklahoma                          | 69/300 (23%)             | 66/238 (28%)             | 76/300 (25%)            | 58/238 (24%)            |
| South Carolina                    | 320/786 (41%)            | 267/660 (40%)            | 174/786 (22%)           | 147/660 (22%)           |
| South Dakota                      | 21/49 (43%)              | 16/44 (36%)              | 12/49 (24%)             | 11/44 (25%)             |
| Tennessee                         | 201/938 (21%)            | 168/884 (19%)            | 213/938 (23%)           | 198/884 (22%)           |
| Texas                             | 1892/3466 (55%)          | 1893/3316 (57%)          | 862/3466 (25%)          | 808/3316 (24%)          |
| Wisconsin                         | 92/811 (11%)             | 63/752 (8%)              | 164/811 (20%)           | 133/752 (18%)           |
| Nebraska                          | 36/134 (27%)             | 50/135 (37%)             | 37/134 (28%)            | 23/135 (17%)            |
| Utah                              | 117/254 (46%)            | 107/250 (43%)            | 52/254 (20%)            | 69/250 (28%)            |
| <b>Total non-expansion states</b> | <b>5,431/14870 (37%)</b> | <b>4,663/13088 (36%)</b> | <b>3604/14870 (24%)</b> | <b>3072/13088 (23%)</b> |
| <b>Expansion states</b>           |                          |                          |                         |                         |
| Arizona                           | 56/139 (40%)             | 61/231 (26%)             | 24/139 (17%)            | 46/231 (20%)            |
| California                        | 453/4411 (10%)           | 281/4417 (6%)            | 1012/4411 (23%)         | 938/4417 (21%)          |
| Colorado                          | 279/832 (34%)            | 110/920 (12%)            | 171/832 (21%)           | 156/920 (17%)           |
| Connecticut                       | 74/745 (10%)             | 98/854 (11%)             | 108/745 (14%)           | 120/854 (14%)           |
| Hawaii                            | 10/143 (7%)              | 13/182 (7%)              | 31/143 (22%)            | 37/182 (20%)            |
| Illinois                          | 433/2030 (21%)           | 416/1945 (21%)           | 441/2030 (22%)          | 400/1945 (21%)          |
| Indiana                           | 242/790 (31%)            | 145/636 (23%)            | 176/790 (22%)           | 113/636 (18%)           |
| Iowa                              | 67/219 (31%)             | 19/193 (10%)             | 35/219 (16%)            | 31/193 (16%)            |
| Kentucky                          | 148/661 (22%)            | 49/887 (6%)              | 165/661 (25%)           | 175/887 (20%)           |
| Louisiana                         | 160/554 (29%)            | 156/606 (26%)            | 138/554 (25%)           | 116/606 (19%)           |
| Maine                             | 57/219 (26%)             | 33/155 (21%)             | 41/219 (19%)            | 29/155 (19%)            |
| Maryland                          | 131/575 (23%)            | 109/464 (23%)            | 145/575 (25%)           | 121/464 (26%)           |
| Michigan                          | 212/1070 (20%)           | 91/1309 (7%)             | 236/1070 (22%)          | 238/1309 (18%)          |
| Minnesota                         | 45/485 (9%)              | 40/527 (8%)              | 96/485 (20%)            | 114/527 (22%)           |
| Montana                           | 23/99 (23%)              | 17/84 (20%)              | 26/99 (26%)             | 19/84 (23%)             |
| Nevada                            | 42/144 (29%)             | 15/147 (10%)             | 50/144 (35%)            | 34/147 (23%)            |
| New Hampshire                     | 40/128 (31%)             | 17/106 (16%)             | 29/128 (23%)            | 21/106 (20%)            |
| New Jersey                        | 646/1115 (58%)           | 337/1214 (28%)           | 265/1115 (24%)          | 250/1214 (21%)          |
| North Dakota                      | 17/44 (39%)              | 4/60 (7%)                | 16/44 (36%)             | 13/60 (22%)             |
| Ohio                              | 718/2117 (24%)           | 275/2252 (12%)           | 472/2117 (22%)          | 408/2252 (18%)          |
| Oregon                            | 102/545 (19%)            | 50/620 (8%)              | 92/545 (17%)            | 97/620 (16%)            |
| Pennsylvania                      | 137/1320 (10%)           | 95/1421 (7%)             | 255/1320 (19%)          | 279/1421 (20%)          |
| Rhode Island                      | 42/289 (15%)             | 26/338 (8%)              | 33/289 (11%)            | 48/338 (14%)            |
| Virginia                          | 460/1128 (41%)           | 462/1078 (43%)           | 259/1128 (23%)          | 234/1078 (22%)          |
| Washington                        | 124/1011 (12%)           | 60/1202 (5%)             | 221/1011 (22%)          | 196/1202 (16%)          |
| West Virginia                     | 53/314 (17%)             | 20/302 (7%)              | 66/314 (21%)            | 47/302 (16%)            |
| <b>Total expansion states</b>     | <b>4771/21127 (23%)</b>  | <b>2999/22150 (14%)</b>  | <b>4603/21127 (22%)</b> | <b>4280/2215 (19%)</b>  |

**eTable 3. Breast Cancer Stage at Diagnosis by Race, Age and State**

| Stage                  | Non – Expansion States <sup>a</sup> |              | Expansion States <sup>b</sup> |              |
|------------------------|-------------------------------------|--------------|-------------------------------|--------------|
|                        | 2012-2013                           | 2015-2016    | 2012-2013                     | 2015-2016    |
| Age < 50 years         |                                     |              |                               |              |
| 0                      | 882                                 | 782          | 1,332                         | 1,328        |
| 1                      | 1,461                               | 1,313        | 2,069                         | 2,249        |
| 2                      | 1,963                               | 1,632        | 2,536                         | 2,576        |
| 3                      | 986                                 | 820          | 1,197                         | 1,021        |
| 4                      | 506                                 | 525          | 567                           | 583          |
| Age ≥ 50 years         |                                     |              |                               |              |
| 0                      | 1,395                               | 1,373        | 2,323                         | 2,498        |
| 1                      | 2,905                               | 2,655        | 4,588                         | 5,346        |
| 2                      | 2,660                               | 2,261        | 3,735                         | 3,843        |
| 3                      | 1,203                               | 921          | 1,648                         | 1,477        |
| 4                      | 909                                 | 806          | 1,239                         | 1,229        |
| White                  |                                     |              |                               |              |
| 0                      | 1,047                               | 894          | 1,767                         | 1,990        |
| 1                      | 2,319                               | 2,007        | 3,997                         | 4,462        |
| 2                      | 2,264                               | 1,829        | 3,420                         | 3,378        |
| 3                      | 1,024                               | 742          | 1,475                         | 1,235        |
| 4                      | 659                                 | 615          | 1,071                         | 1,033        |
| Black                  |                                     |              |                               |              |
| 0                      | 687                                 | 641          | 796                           | 790          |
| 1                      | 1,154                               | 1,074        | 1,068                         | 1,311        |
| 2                      | 1,392                               | 1,131        | 1,255                         | 1,238        |
| 3                      | 703                                 | 591          | 608                           | 512          |
| 4                      | 517                                 | 487          | 409                           | 408          |
| Hispanic               |                                     |              |                               |              |
| 0                      | 453                                 | 521          | 730                           | 687          |
| 1                      | 747                                 | 749          | 1,032                         | 1,313        |
| 2                      | 879                                 | 842          | 1,142                         | 1,263        |
| 3                      | 417                                 | 354          | 545                           | 541          |
| 4                      | 206                                 | 208          | 199                           | 241          |
| Asian/Pacific Islander |                                     |              |                               |              |
| 0                      | 72                                  | 76           | 305                           | 349          |
| 1                      | 116                                 | 134          | 497                           | 575          |
| 2                      | 136                                 | 118          | 485                           | 514          |
| 3                      | 52                                  | 45           | 192                           | 191          |
| 4                      | 26                                  | 30           | 104                           | 119          |
| All races              |                                     |              |                               |              |
| Early (0,1,2)          | 11,266 (76%)                        | 10,016 (77%) | 16,524 (78%)                  | 17,870 (81%) |
| Late (3,4)             | 3,604 (24%)                         | 3,072 (23%)  | 4,603 (22%)                   | 4,280 (19%)  |
| Total                  | 14,870                              | 13,088       | 21,127                        | 22,150       |

**eTable 4. 2016 State Demographic Information**

| Non-expansion states    | Federal Poverty Limit |          |                    | Unemployment Rate |
|-------------------------|-----------------------|----------|--------------------|-------------------|
|                         | Under 100%            | 100-199% | Percent Under 200% |                   |
| Alabama                 | 17%                   | 20%      | 37%                | 6.0%              |
| Florida                 | 15%                   | 21%      | 36%                | 4.9%              |
| Georgia                 | 16%                   | 19%      | 35%                | 5.4%              |
| Kansas                  | 12%                   | 18%      | 30%                | 4.3%              |
| Mississippi             | 21%                   | 21%      | 42%                | 5.7%              |
| Missouri                | 14%                   | 19%      | 33%                | 4.7%              |
| North Carolina          | 16%                   | 20%      | 36%                | 5.1%              |
| Oklahoma                | 16%                   | 21%      | 37%                | 5.0%              |
| South Carolina          | 15%                   | 21%      | 36%                | 4.5%              |
| South Dakota            | 14%                   | 17%      | 31%                | 2.9%              |
| Tennessee               | 16%                   | 20%      | 36%                | 4.9%              |
| Texas                   | 16%                   | 20%      | 36%                | 4.7%              |
| Wisconsin               | 12%                   | 15%      | 27%                | 4.2%              |
| Nebraska                | 12%                   | 17%      | 29%                | 3.3%              |
| Utah                    | 10%                   | 17%      | 27%                | 3.3%              |
| <b>Mean</b>             | 14.8%                 | 19%      | 34%                | 5%                |
| <b>Median</b>           | 15%                   | 20%      | 36%                | 5%                |
| <b>Expansion states</b> |                       |          |                    |                   |
| Arizona                 | 17%                   | 20%      | 37%                | 5.1%              |
| California              | 14%                   | 18%      | 32%                | 5.3%              |
| Colorado                | 11%                   | 16%      | 27%                | 3.2%              |
| Connecticut             | 9%                    | 12%      | 21%                | 4.8%              |
| Hawaii                  | 9%                    | 13%      | 22%                | 3.0%              |
| Illinois                | 13%                   | 17%      | 30%                | 5.8%              |
| Indiana                 | 14%                   | 18%      | 32%                | 4.3%              |
| Iowa                    | 11%                   | 16%      | 27%                | 3.6%              |
| Kentucky                | 19%                   | 19%      | 38%                | 5.0%              |
| Louisiana               | 20%                   | 19%      | 39%                | 6.1%              |
| Maine                   | 13%                   | 17%      | 30%                | 4.0%              |
| Maryland                | 9%                    | 12%      | 21%                | 4.2%              |
| Michigan                | 15%                   | 17%      | 32%                | 5.0%              |
| Minnesota               | 10%                   | 14%      | 24%                | 4.0%              |
| Montana                 | 13%                   | 21%      | 34%                | 4.1%              |
| Nevada                  | 14%                   | 21%      | 35%                | 5.4%              |
| New Hampshire           | 7%                    | 12%      | 19%                | 2.8%              |
| New Jersey              | 10%                   | 13%      | 23%                | 4.9%              |
| North Dakota            | 12%                   | 14%      | 26%                | 3.1%              |
| Ohio                    | 14%                   | 17%      | 31%                | 5.0%              |
| Oregon                  | 13%                   | 19%      | 32%                | 4.9%              |
| Pennsylvania            | 13%                   | 16%      | 29%                | 5.5%              |
| Rhode Island            | 13%                   | 15%      | 28%                | 5.3%              |
| Virginia                | 11%                   | 14%      | 25%                | 4.1%              |
| Washington              | 11%                   | 16%      | 27%                | 5.3%              |
| West Virginia           | 18%                   | 21%      | 39%                | 5.9%              |
| <b>Mean</b>             | 12.8%                 | 16.4%    | 29%                | 4.6%              |
| <b>Median</b>           | 13%                   | 16.5%    | 30%                | 4.9%              |
